# Supplementary material for: A recyclable heterogeneous nanocatalyst of copper-grafted natural asphalt sulfonate (NAS@Cu): characterization, synthesis and application in the Suzuki–Miyaura coupling reaction
Source: Royal Society of Chemistry journal article supplement (doi:10.1039/d0nj01883j), 2020-01-01
Supplement: d0nj01883j1.pdf [file d0nj01883j1.pdf]

## New Journal of Chemistry

### Supporting Information

#### **The recyclable heterogeneous nanocatalyst of copper-grafted natural asphalt sulfonate (NAS@Cu): Characterization, synthesis and application in the Suzuki-Miyaura coupling reaction**

Homa Kohzadi<sup>1</sup> and Mohammad Soleiman-Beigi<sup>2\*</sup>

<sup>1,2</sup>Department of Chemistry Basic of Sciences Faculty, Ilam University, PO Box 69315–516, Ilam, Iran

\* E-mail: SoleimanBeigi@yahoo.com

Supporting information includes Elemental mapping for NAS@Cu, SEM images of NA, Na-NAS, NAS@Cu and NAS@Cu after recovery, FT-IR spectra of natural asphalt and natural asphalt sulfonate, TEM image of NAS@Cu , selected original spectrums and Selected spectral data of the synthesized biphenyl derivatives.

## TABLE OF CONTENTS

| Contents                                                                                                | Page |
|---------------------------------------------------------------------------------------------------------|------|
| Figure S1. Elemental mapping for NAS@Cu                                                                 | 3    |
| Figure S2. SEM images of NA and Na- NAS                                                                 | 4    |
| Figure S3. SEM images of NAS@Cu and NAS@Cu after recovery                                               | 5    |
| Figure S4. FT-IR spectra of natural asphalt and natural asphalt sulfonate                               | 6    |
| Figure S5. TEM image of NAS@Cu                                                                          | 7    |
| Figure S6. $^1\text{H}$ NMR spectrum of 1,1'-Biphenyl ( $\text{CDCl}_3$ , 400 MHz)                      | 8    |
| Figure S7. $^{13}\text{C}$ NMR spectrum of 1,1'-Biphenyl (100 MHz, $\text{CDCl}_3$ )                    | 9    |
| Figure S8. $^1\text{H}$ NMR spectrum 4-Methoxy-1,1'-biphenyl ( $\text{CDCl}_3$ , 400 MHz)               | 10   |
| Figure S9. $^{13}\text{C}$ NMR spectrum of 4-Methoxy-1,1'-biphenyl (100 MHz, $\text{CDCl}_3$ )          | 11   |
| Figure S10. $^1\text{H}$ NMR spectrum of 4-Methyl-1,1'-biphenyl ( $\text{CDCl}_3$ , 400 MHz)            | 12   |
| Figure S11. $^{13}\text{C}$ NMR spectrum of 4-Methyl-1,1'-biphenyl (100 MHz, $\text{CDCl}_3$ )          | 13   |
| Figure S12. $^1\text{H}$ NMR spectrum of 4-Nitro-1,1'-biphenyl ( $\text{CDCl}_3$ , 400 MHz)             | 14   |
| Figure S13. $^{13}\text{C}$ NMR spectrum of 4-Nitro-1,1'-biphenyl (100 MHz, $\text{CDCl}_3$ )           | 15   |
| Figure S14. $^1\text{H}$ NMR spectrum of 2-Phenylnaphthalene ( $\text{CDCl}_3$ , 400 MHz)               | 16   |
| Figure S15. $^{13}\text{C}$ NMR spectrum of 2-Phenylnaphthalene (100 MHz, $\text{CDCl}_3$ )             | 17   |
| Figure S16. $^1\text{H}$ NMR spectrum of [1,1'- Biphenyl]-4-carbonitrile ( $\text{CDCl}_3$ , 400 MHz)   | 18   |
| Figure S17. $^{13}\text{C}$ NMR spectrum of [1,1'- Biphenyl]-4-carbonitrile (100 MHz, $\text{CDCl}_3$ ) | 19   |
| Selected spectral data                                                                                  | 20   |
| References                                                                                              | 21   |

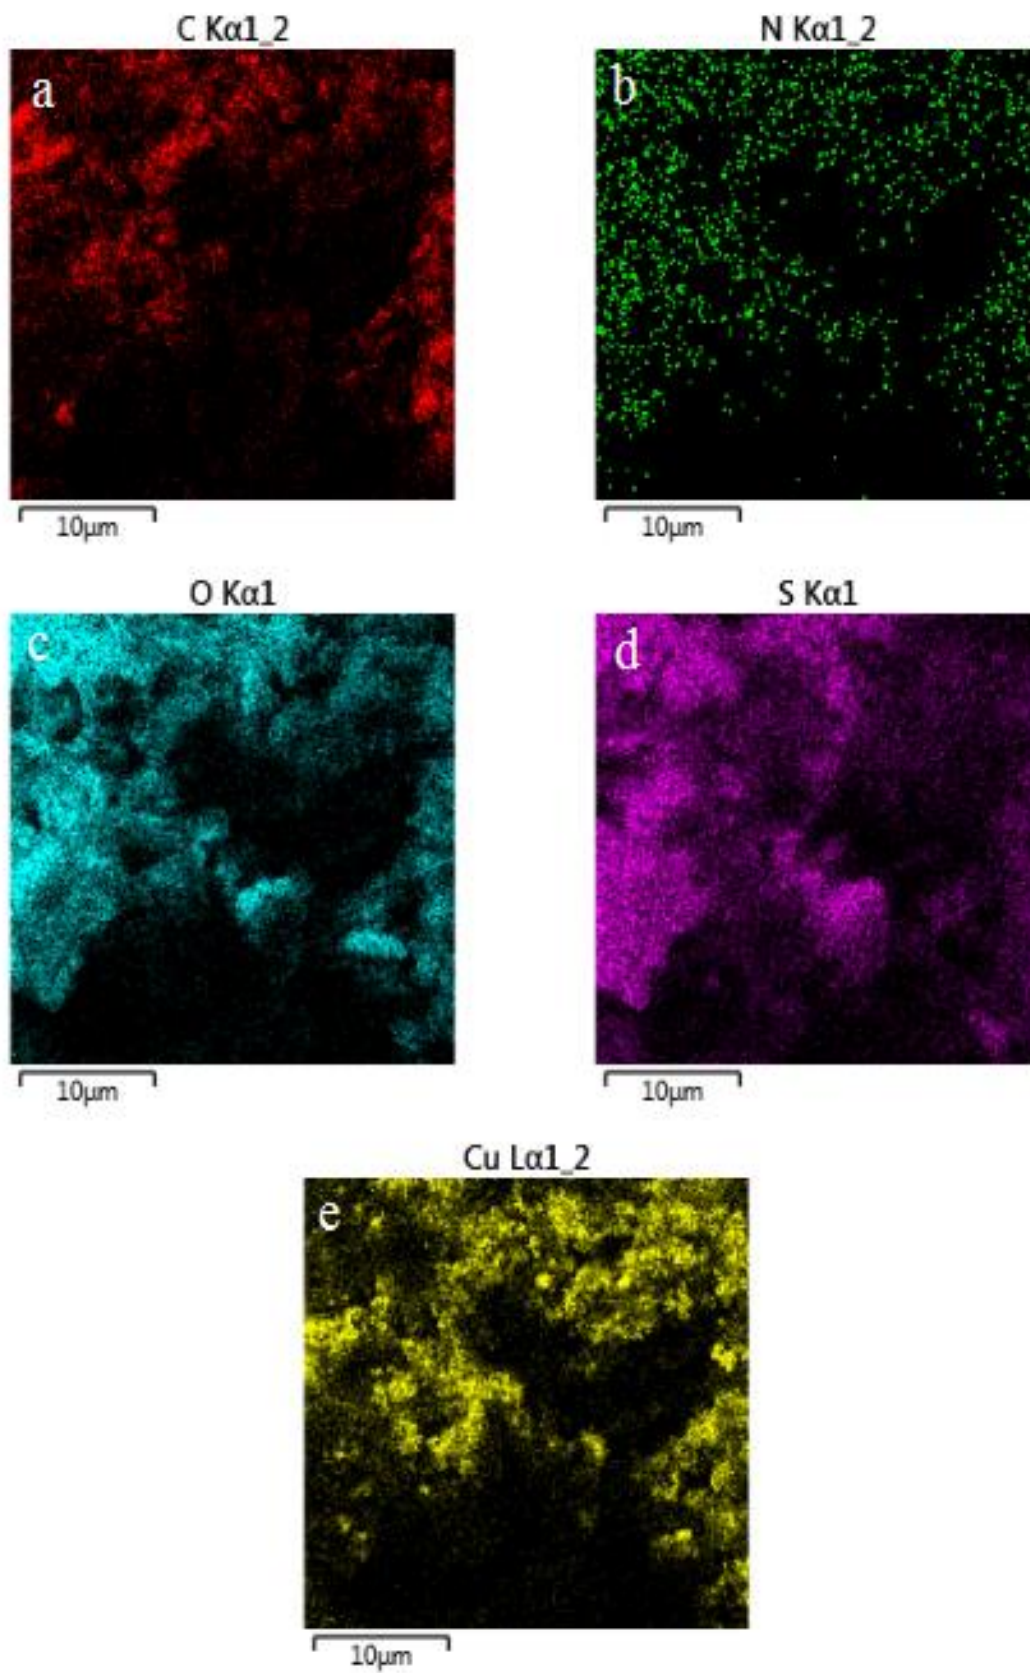

**Figure S1.** Elemental mapping of C (a), N (b), O (c), S (d) and Cu (e) for NAS@Cu

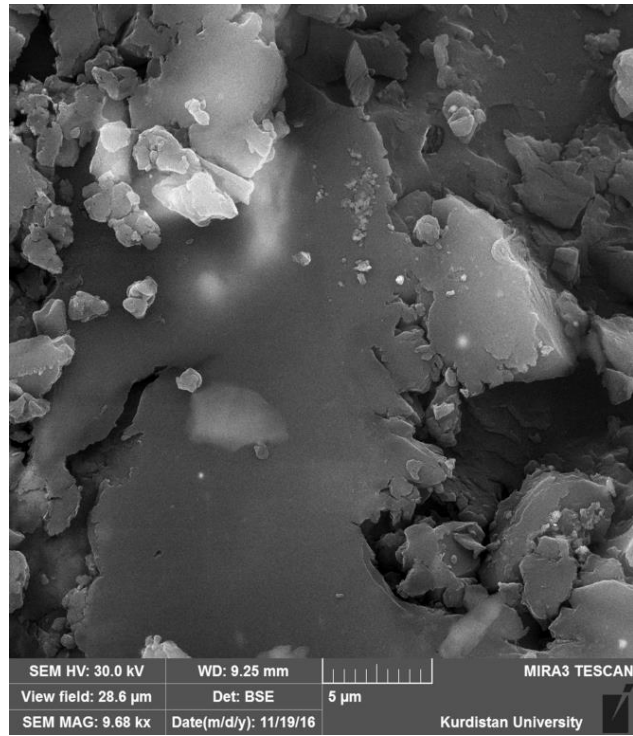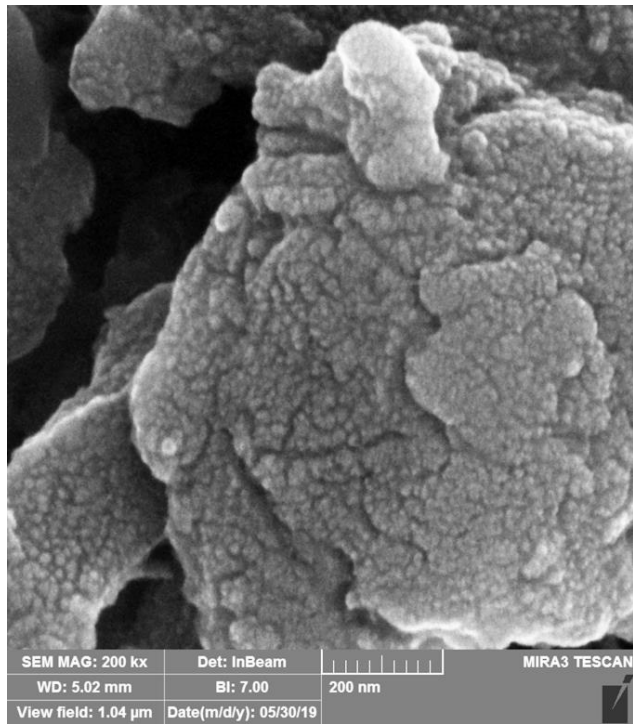

**Figure S2:** SEM images of NA and Na- NAS

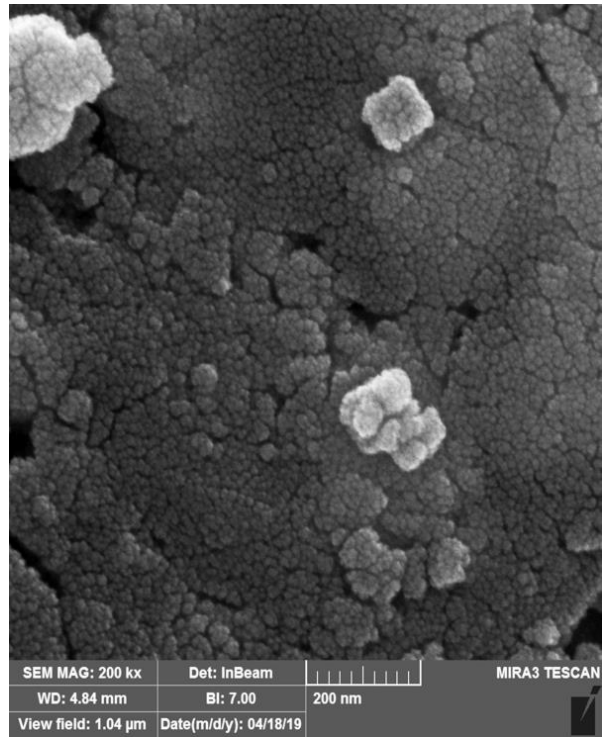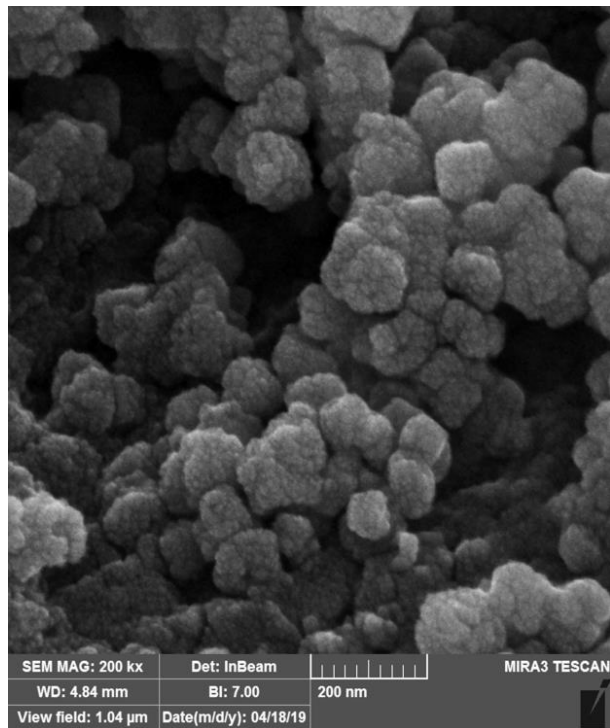

**Figure S3.** SEM images of NAS@Cu and NAS@Cu after the recovery

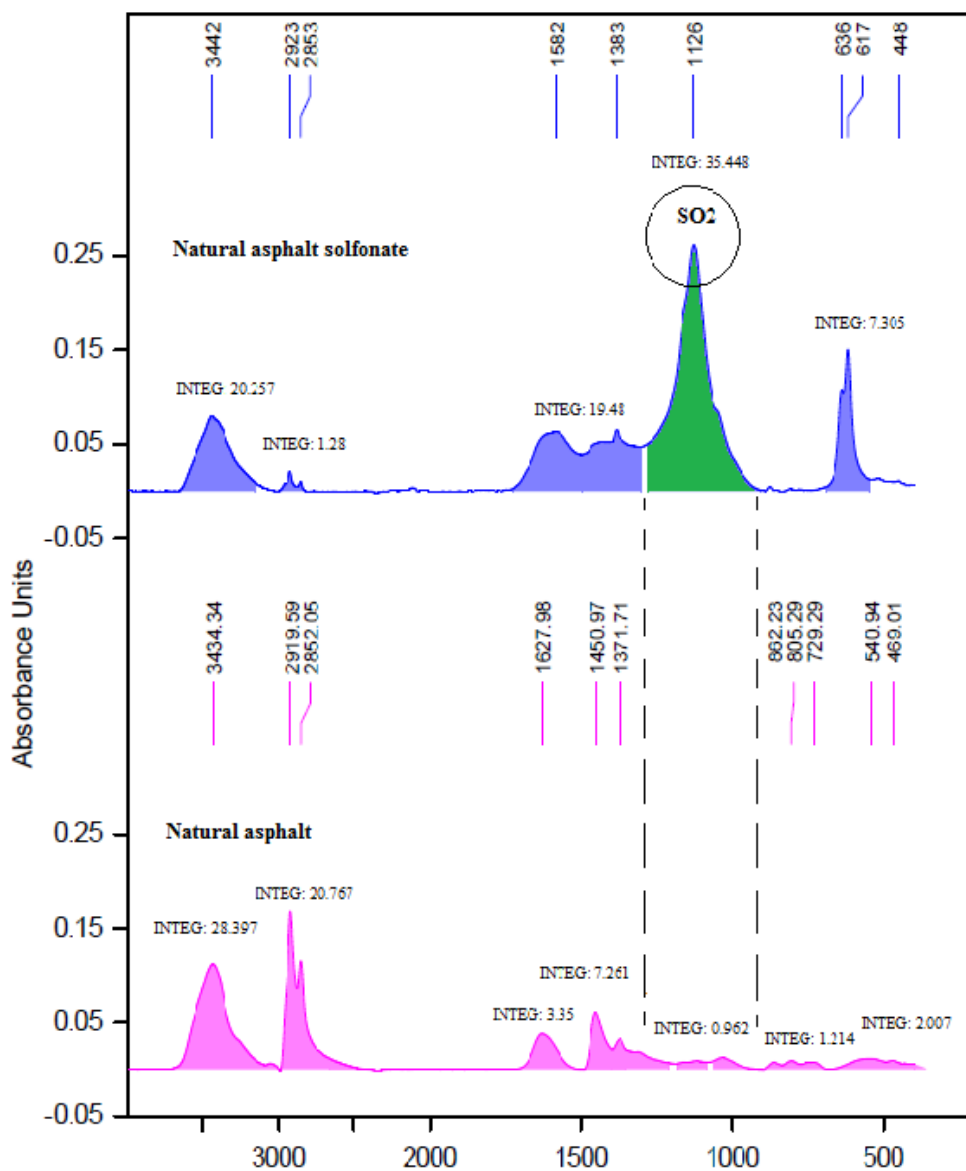

**Figure S4.** FT-IR spectra of natural asphalt and natural asphalt sulfonate

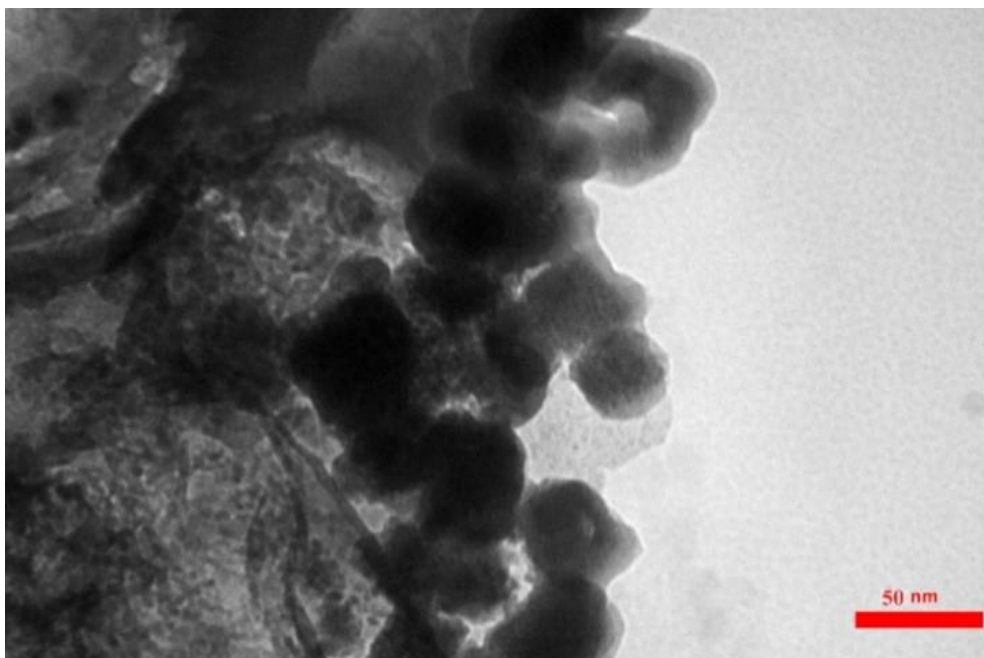

**Figure S5.**TEM image of NAS@Cu

**<sup>1</sup>H NMR (400 MHz, CDCl<sub>3</sub>)**

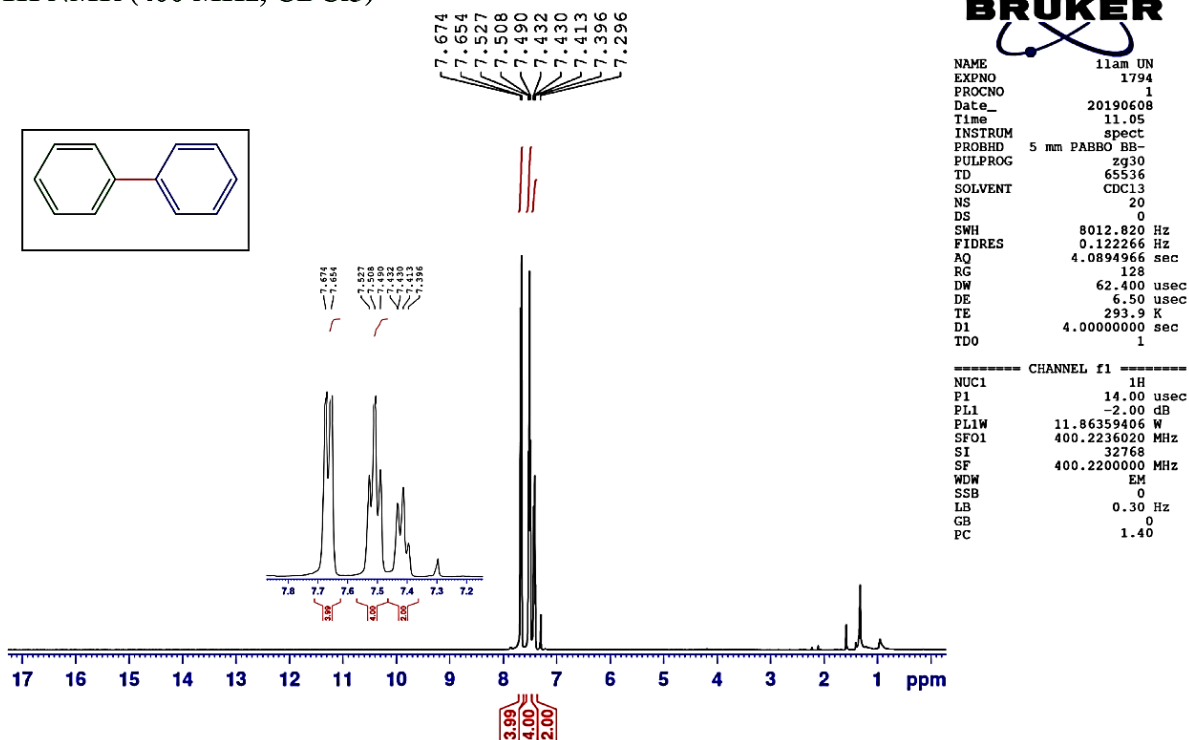

**Fig S6.** <sup>1</sup>H NMR spectrum of 1,1'-Biphenyl



**<sup>13</sup>C NMR (100 MHz, CDCl<sub>3</sub>)**

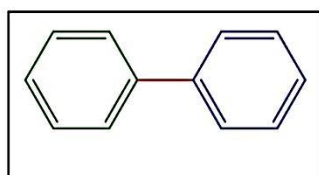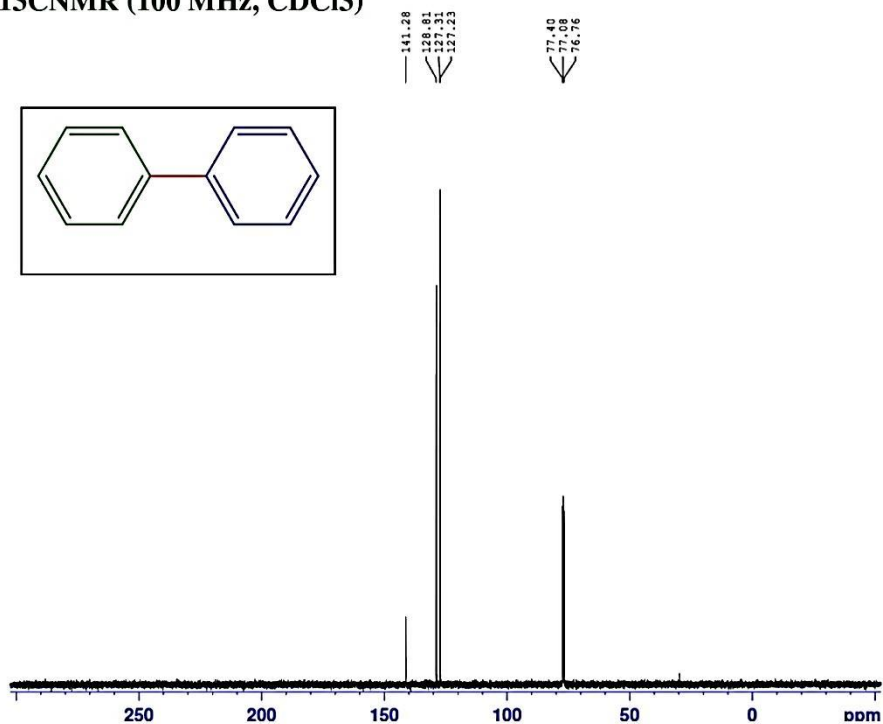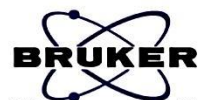

```
NAME 11am UN
EXPNO 1795
PROCNO 1
Date_ 20190608
Time 11.06
INSTRUM spect
PROBHD 5 mm PABBO BB-
PULPROG zgpg30
TD 65536
SOLVENT CDCl3
NS 124
DS 0
SWH 35714.285 Hz
FIDRES 0.544957 Hz
AQ 0.9175540 sec
RG 2050
DW 14.000 usec
DE 6.50 usec
TE 293.9 K
D1 1.00000000 sec
D11 0.03000000 sec
TDO 1

===== CHANNEL f1 =====
NUC1 13C
P1 9.00 usec
PL1 -0.90 dB
PL1W 42.02801895 W
SFO1 100.6479784 MHz

===== CHANNEL f2 =====
CPDPRG2 waltz16
NUC2 1H
PCPD2 90.00 usec
PL2 -2.00 dB
PL12 14.48 dB
PL13 17.90 dB
PL2W 11.86359406 W
PL12W 0.26681873 W
PL13W 0.12139934 W
SFO2 400.2216009 MHz
SI 32768
SF 100.6353990 MHz
WDW EM
SSB 0
LB 1.00 Hz
GB 0
PC 1.40
```

**Fig S7.** <sup>13</sup>C NMR spectrum of 1,1'-Biphenyl

**<sup>1</sup>H NMR (400 MHz, CDCl<sub>3</sub>)**

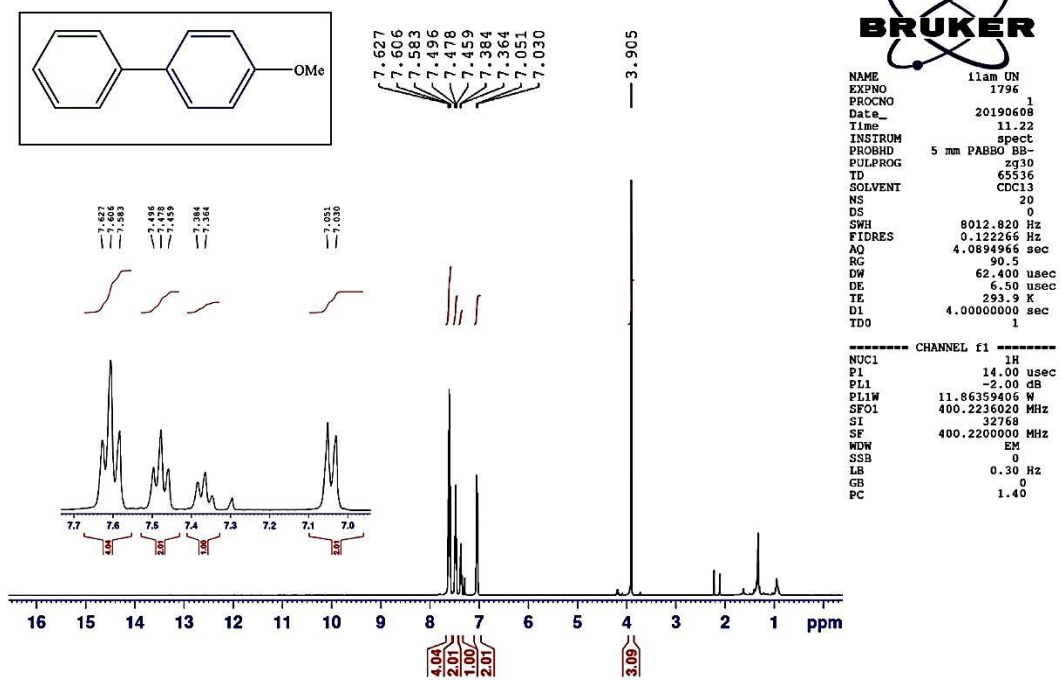

**Fig S8.** <sup>1</sup>H NMR spectrum 4-Methoxy-1,1'-biphenyl

**<sup>13</sup>CNMR (100 MHz, CDCl<sub>3</sub>)**

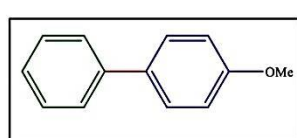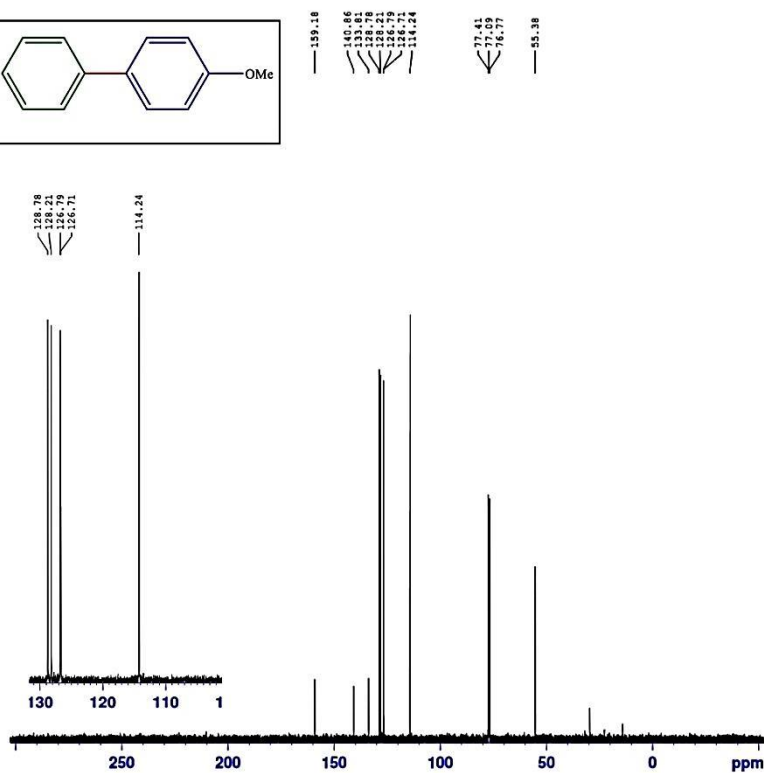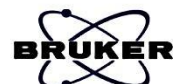

```

NAME      11am UN
EXPNO     1797
PROCNO    1
Date_     20190608
Time      11.30
INSTRUM   spect
PROBHD    5 mm PABBO BB-
PULPROG   zgpg30
TD         65536
SOLVENT   CDCl3
NS         150
DS         0
SWH        35714.285 Hz
FIDRES     0.544957 Hz
AQ         0.9175540 sec
RG         2050
DW         14.000 usec
DE         6.50 usec
TE         294.3 K
D1         1.00000000 sec
D11        0.03000000 sec
TDO        1
    
```

```

----- CHANNEL f1 -----
NUC1      13C
P1         9.00 usec
PL1        -0.90 dB
PL1W       42.02801895 W
SFO1      100.6479784 MHz
    
```

```

----- CHANNEL f2 -----
CPDPRG2   waltz16
NUC2       1H
PCPD2     90.00 usec
PL2        -2.00 dB
PL12       14.48 dB
PL13       17.90 dB
PLW        11.86359406 W
PL12W      0.26681873 W
PL13W      0.12139934 W
SFO2      400.2215009 MHz
SI         32768
SF         100.6353990 MHz
WDW        EM
SSB        0
LB         1.00 Hz
GB         0
PC         1.40
    
```

**Fig S9.** <sup>13</sup>C NMR spectrum of 4-Methoxy-1,1'-biphenyl

**<sup>1</sup>H NMR (400 MHz, CDCl<sub>3</sub>)**

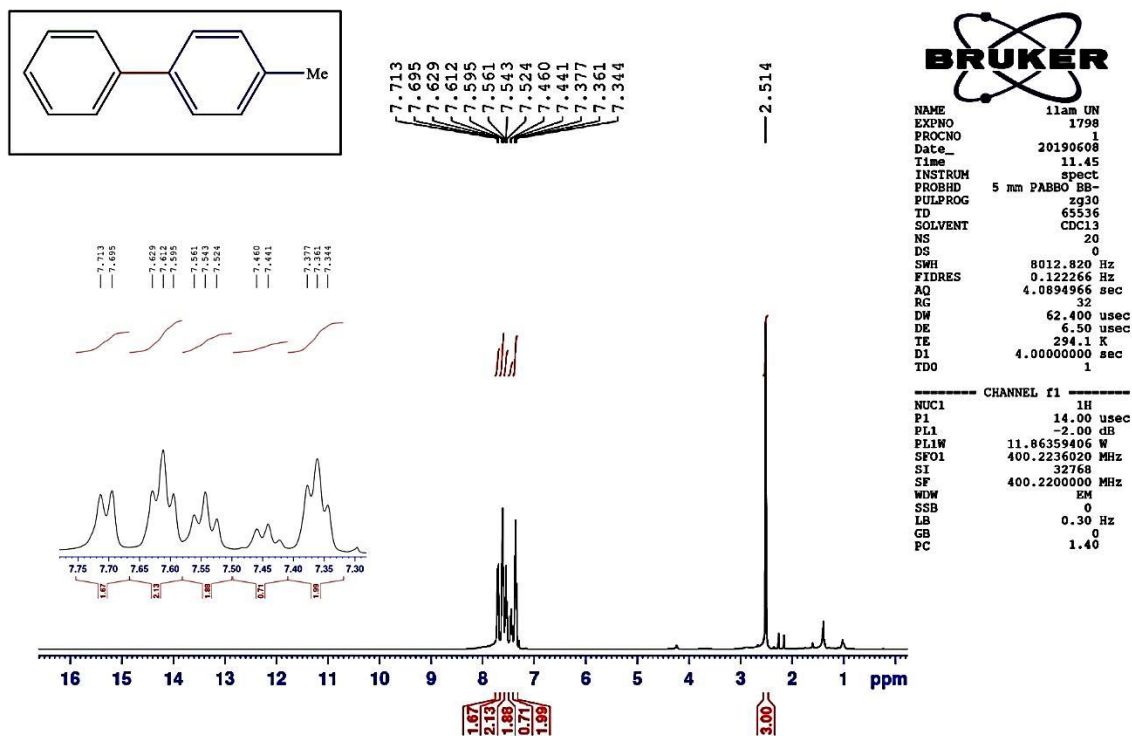

**Fig S10.** <sup>1</sup>H NMR spectrum of 4-Methyl-1,1'-biphenyl

**<sup>13</sup>CNMR (100 MHz, CDCl<sub>3</sub>)**

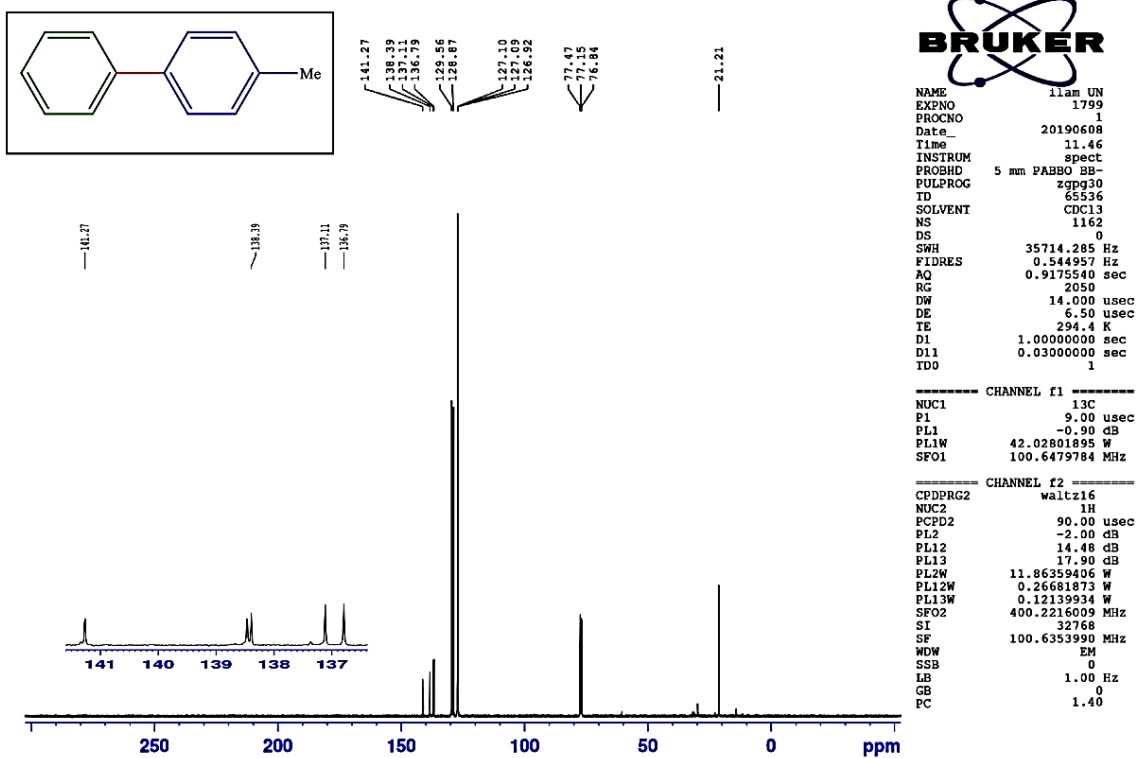

**Fig S11.** <sup>13</sup>C NMR spectrum of 4-Methyl-1,1'-biphenyl

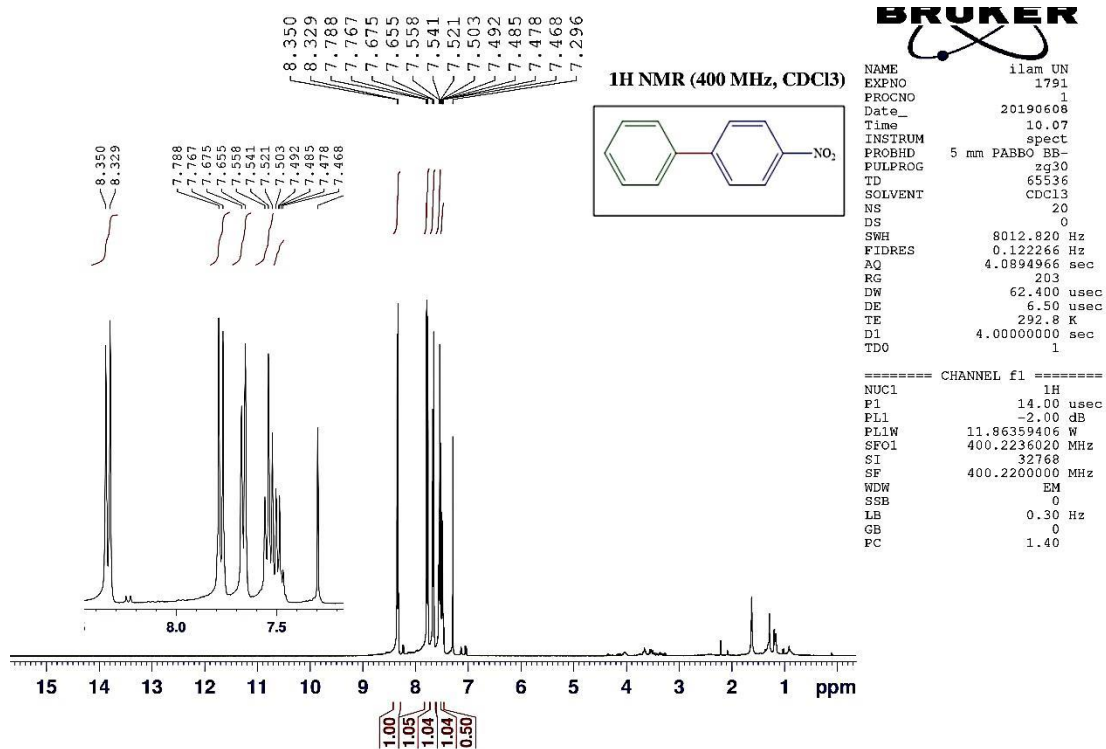

**Fig S12.** <sup>1</sup>H NMR spectrum of 4-Nitro-1,1'-biphenyl

**<sup>13</sup>CNMR (100 MHz, CDCl<sub>3</sub>)**

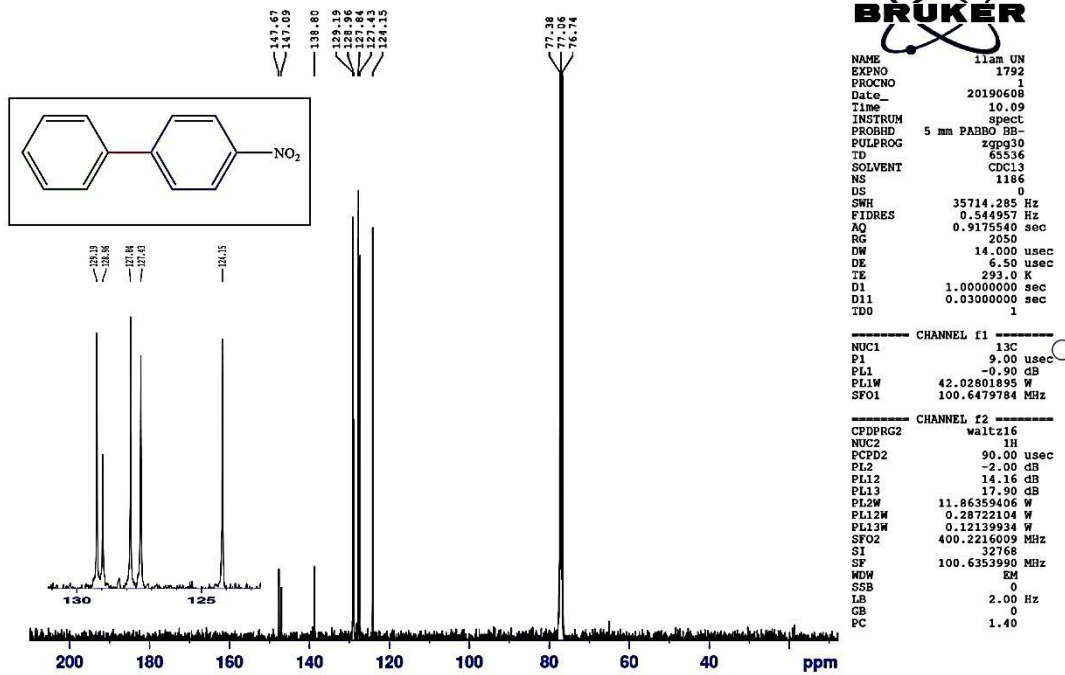

**Fig S13.** <sup>13</sup>C NMR spectrum of 4-Nitro-1,1'-biphenyl





**<sup>13</sup>CNMR (100 MHz, CDCl<sub>3</sub>)**

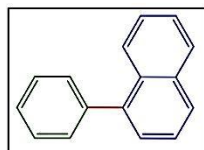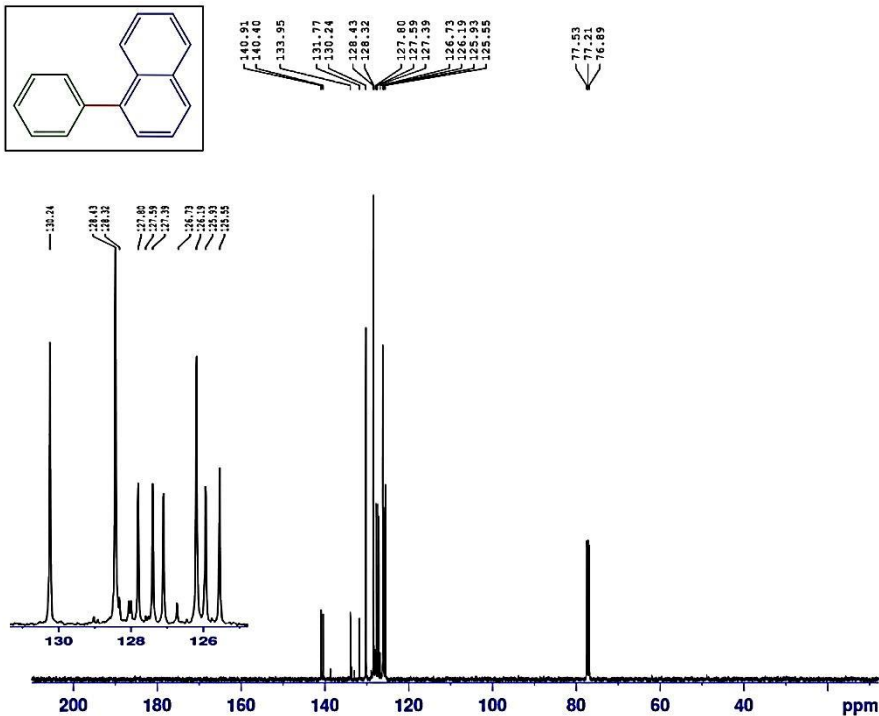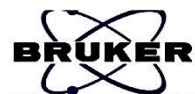

```

NAME      11am UN
EXPNO     1788
PROCNO    1
Date_     20190608
Time      9.05
INSTRUM   spect
PROBHD    5 mm PABBO BB-
PULPROG   zgpg30
TD         65536
SOLVENT   CDCl3
NS         147
DS         0
SWH        35714.285 Hz
AQ         0.544957 Hz
RG         0.9175540 sec
DE         2050
DW         14.000 usec
TE         293.0 K
D1         1.00000000 sec
D11        0.03000000 sec
TD0        1

----- CHANNEL f1 -----
NUC1       13C
P1         9.00 usec
PL1        -0.90 dB
PL1W       42.02801895 W
SF01       100.6479784 MHz

----- CHANNEL f2 -----
CPDPRG2   waltz16
NUC2       1H
PCPD2     90.00 usec
PL2        -2.00 dB
PL12       14.16 dB
PL13       17.90 dB
PL2W       11.86359406 W
PL12W     0.28722104 W
PL13W     0.12139934 W
SF02       400.2216009 MHz
SI         32768
SF         100.6353990 MHz
WDW        EM
SSB        0
LB         2.00 Hz
GB         0
PC         1.40
    
```

**Fig S15.** <sup>13</sup>C NMR spectrum of 2-Phenylnaphthalene

1H NMR (400 MHz, CDCl3)

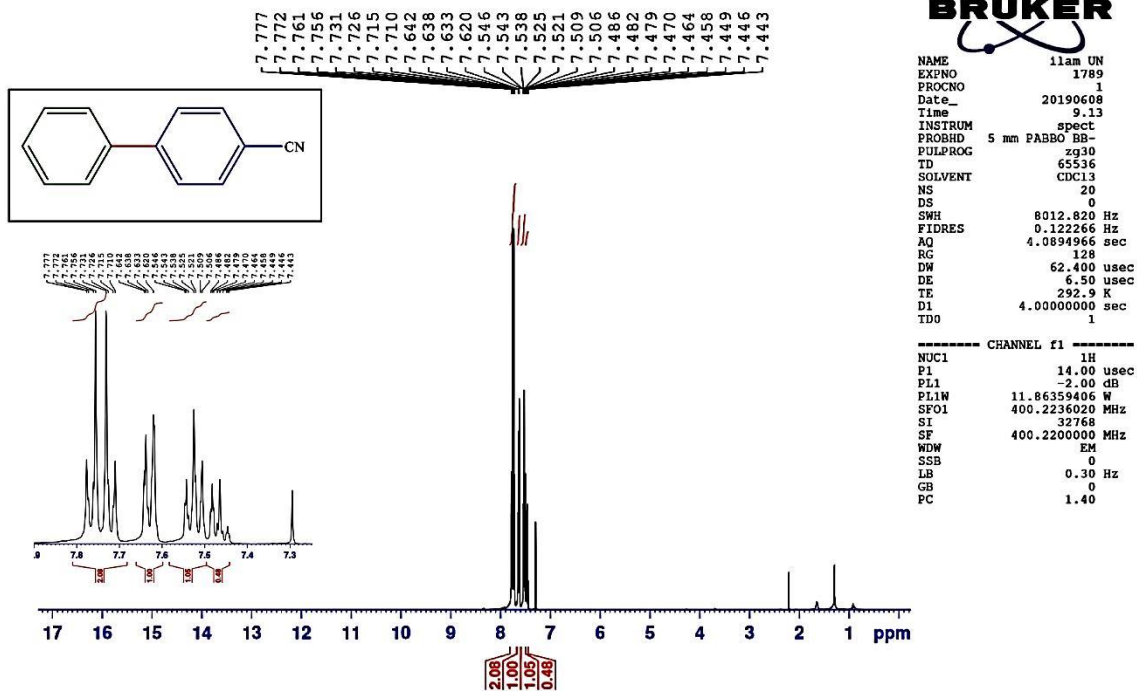

Fig S16. <sup>1</sup>H NMR spectrum of [1,1'-Biphenyl]-4-carbonitrile

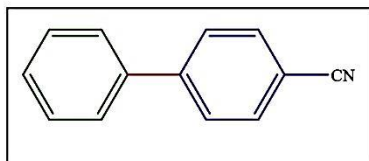

**<sup>13</sup>C NMR (100 MHz, CDCl<sub>3</sub>)**

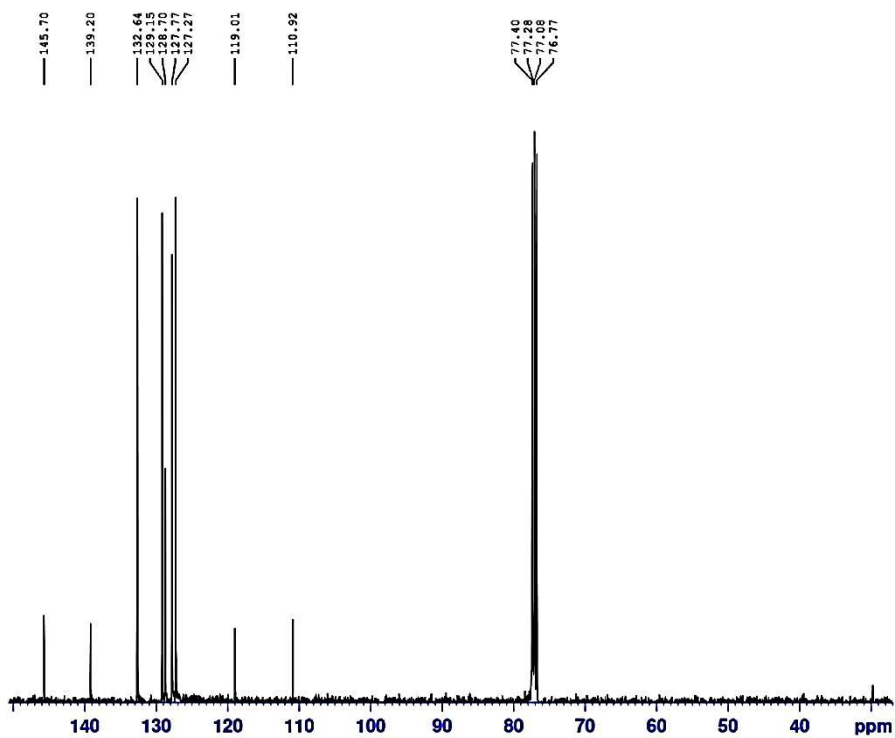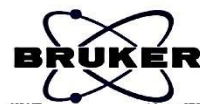

```

NAME      11am UN
EXPNO     1790
PROCNO    1
Date_     20190608
Time      9.15
INSTRUM   spect
PROBHD    5 mm PABBO BB-
PULPROG   zgpg30
TD        65536
SOLVENT   CDCl3
NS        549
DS        0
SWH       35714.285 Hz
FIDRES    0.544957 Hz
AQ        0.9175540 sec
RG        2050
DW        14.000 usec
DE        6.50 usec
TE        292.8 K
D1        1.00000000 sec
D11       0.03000000 sec
TD0       1
  
```

```

----- CHANNEL f1 -----
NUC1      13C
P1        9.00 usec
PL1       -0.90 dB
PL1W      42.02801895 W
SFO1      100.6479784 MHz
  
```

```

----- CHANNEL f2 -----
CFDPRG2   waltz16
NUC2      1H
PCPD2     90.00 usec
PL2       -2.00 dB
PL12      14.16 dB
PL13      17.90 dB
PL2W      11.86359406 W
PL12W     0.28722104 W
PL13W     0.12139934 W
SFO2      400.2216009 MHz
SI        32768
SF        100.6353990 MHz
WDW       EM
SSB       0
LB        2.00 Hz
GB        0
PC        1.40
  
```

**Fig S17.** <sup>13</sup>C NMR spectrum of [1,1'-Biphenyl]-4-carbonitrile

### Selected spectral data

**1,1'-Biphenyl:** White solid, Mp (°C): 63-65, <sup>1</sup>H NMR (400 MHz, CDCl<sub>3</sub>): δH= 7.41 (t, J= 8Hz, 2H), <sup>13</sup>CNMR (100 MHz, CDCl<sub>3</sub>): δ = 127.2, 127.3, 129.8, 141.3.

**4-Methoxy-1,1'-biphenyl:** White solid, Mp (°C):83-85, <sup>2</sup> <sup>1</sup>H NMR (400 MHz, CDCl<sub>3</sub>): δH= 3.91(s, 3H), 7.03-7.05 (d, J= 8Hz, 2H), 7.47 (t, J= 8Hz, 2H), 7.60 (t, J= 8Hz, 2H) ppm. <sup>13</sup>CNMR (100 MHz, CDCl<sub>3</sub>): δ = 55.4, 114.2, 126.7, 126.8, 128.2, 128.8, 133.8, 140.9, 159.1.

**4-Nitro-1,1'-biphenyl:** Pale yellow solid, Mp (°C): 110-114, <sup>1</sup>H NMR (400 MHz, CDCl<sub>3</sub>): δH= 7.29-7.78 (m, 5H), 7.76-7.78 (d, J= 8 Hz, 2H), 8.29-8.50 (d, J= 8Hz, 2H) ppm. <sup>13</sup>CNMR (100 MHz, CDCl<sub>3</sub>): δ = 124.15, 127.43, 127.84, 128.96, 129.19, 138.80, 147.09, 147.67.

**2-Phenylnaphthalene:** oil, <sup>3</sup> <sup>1</sup>H NMR (400 MHz, CDCl<sub>3</sub>): δH= 7.54-7.58 (m,3H), 7.60-7.70 (m, 6H), 7.98-8.01 (m, 1H) ppm. <sup>13</sup>CNMR (100 MHz, CDCl<sub>3</sub>): δ = 125.55, 125.93, 126.19, 126.73, 127.39, 127.59, 127.80, 128.32, 128.43, 130.24, 131.77, 133.95, 140.40, 140.91.

**[1,1'-Biphenyl]-4-carbonitrile:** White solid, Mp (°C) 80-82, <sup>1</sup>H NMR (400 MHz, CDCl<sub>3</sub>): δH= 7.46 (t, J= 8Hz, 1H), 7.52 (t, J= 8Hz, 2H), 7.62-7.64 (d, J= 8 Hz, 2H),7.71-7.77 (q, J= 8Hz, 4H) ppm. <sup>13</sup>CNMR (100 MHz, CDCl<sub>3</sub>): δ = 110.92, 119.01, 127.27, 127.77, 128.70, 129.15, 132.64, 139.20, 145.70.

**4-Methyl-1,1'-biphenyl:** White solid, Mp (°C): 44-46, <sup>1</sup>H NMR (400 MHz, CDCl<sub>3</sub>): δH= 2.51(s, 3H), 7.36 (t, J= 8Hz, 2H), 7.54 (t, J= 8Hz, 2H), 7.61 (t, J= 8Hz, 2H), 7.69-7.71 (d, J= 8Hz, 2H) ppm. <sup>13</sup>CNMR (100 MHz, CDCl<sub>3</sub>): δ =21.1, 126.9, 127.1, 128.9, 129.5, 136.8, 137.1, 138.4, 141.2.

## References

1. Q. Zhang, H. Su, J. Luo and Y. Wei, *Tetrahedron*. 14 ( 2013) 447-54.
2. J. F. Wei, J. Jiao, J. J, Feng, J. Lv, X. R. Zhang, X. Y. Shi and Z. G. Chen, *J. Org. Chem.* 74 ( 2009) 6283-6.
3. L. Bai and J.X. Wang, *Adv. Synth. Catal.* 25 (2008) 315-20.
